# Supplementary material for: Photoinduced micropatterning by polymorphic crystallization of a photochromic diarylethene in a polymer film
Source: Royal Society of Chemistry journal article supplement (doi:10.1039/c0cc00061b), 2010-01-01
Supplement: c0cc00061b.pdf [file c0cc00061b.pdf]

## Supplementary Information:

### **Photoinduced micropatterning by polymorphic crystallization of a photochromic diarylethene in a polymer film**

**Daichi Kitagawa,<sup>1</sup> Itsuka Yamashita<sup>1</sup> and Seiya Kobatake<sup>1,2,\*</sup>**

<sup>1</sup>*Department of Applied Chemistry, Graduate School of Engineering, Osaka City University, 3-3-138 Sugimoto, Sumiyoshi-ku, Osaka 558-8585, Japan*

<sup>2</sup>*Precursory Research for Embryonic Science and Technology (PRESTO), Japan Science and Technology Agency (JST), Kawaguchi Center Building, 4-1-8 Honcho, Kawaguchi 332-0012, Japan*

\*E-mail: kobatake@a-chem.eng.osaka-cu.ac.jp

### Contents:

**Fig. S1.** Photographs during the thermodynamic phase transition between  $\alpha$ -crystal and  $\gamma$ -crystal. a, At room temperature. b, After heated for 1 min at 190 °C. c, After heated for 3 min at 190 °C. d, After heated for 5 min at 190 °C.

**Fig. S2.** ORTEP drawings of **1a- $\gamma$**  showing 50% probability displacement ellipsoids. a, Top view. b, Side view. Two molecules are crystallographically independent. The fluorine atoms are disordered.

**Fig. S3.** Powder X-ray diffraction patterns. a, Microcrystal **1a- $\alpha$** . b, Microcrystal **1a- $\gamma$** . c, **1a**/PMMA film heated for 2 min at 130 °C.

**Fig. S4.** Cross-sectional view of a part on photomicro patterning. The left and right sides in the sectional view are the amorphous and microcrystalline states, respectively.

**Fig. S5.** Optical microphotographs of photopatterning prepared under the various conditions. The white and black parts are the amorphous and micro-crystalline states, respectively. b and e are under the same condition.

**Table S1.** X-ray crystallographic data of **1a- $\gamma$** .

**Video S1.** The movie shows the crystal growth of **1a- $\gamma$**  from the transparent film of the mixture containing PMMA/1a (1:5 wt ratio). The stage was heated at 130 °C. The movie is fast-forwarded as much as 8 times.

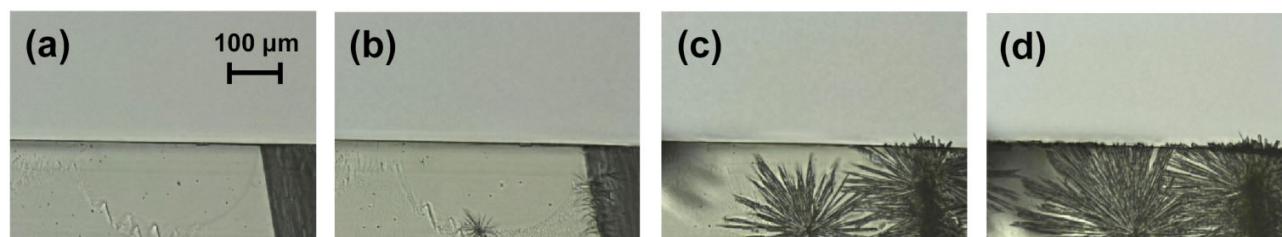

**Fig. S1.** Photographs during the thermodynamic phase transition between  $\alpha$ -crystal and  $\gamma$ -crystal.  
a, At room temperature. b, After heated for 1 min at 190 °C. c, After heated for 3 min at 190 °C.  
d, After heated for 5 min at 190 °C.

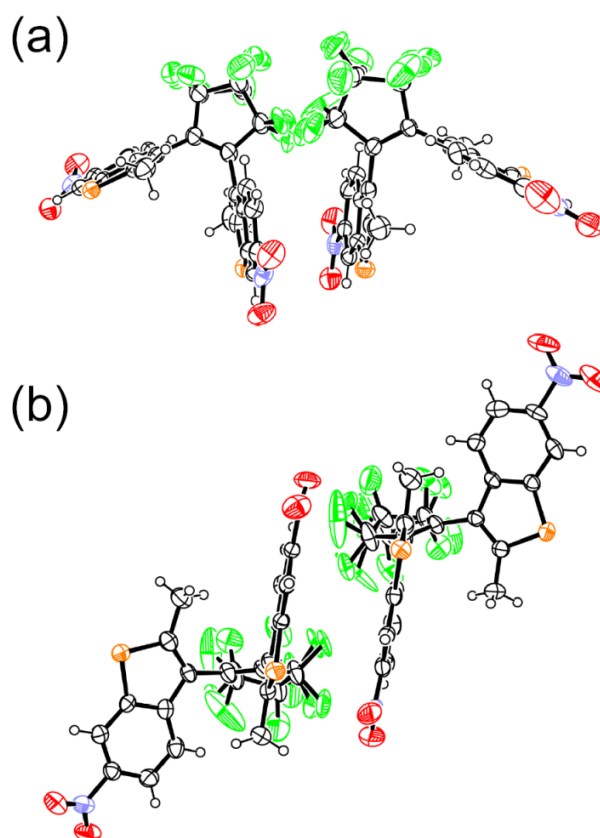

**Fig. S2.** ORTEP drawings of **1a-γ** showing 50% probability displacement ellipsoids. a, Top view. b, Side view. Two molecules are crystallographically independent. The fluorine atoms are disordered.

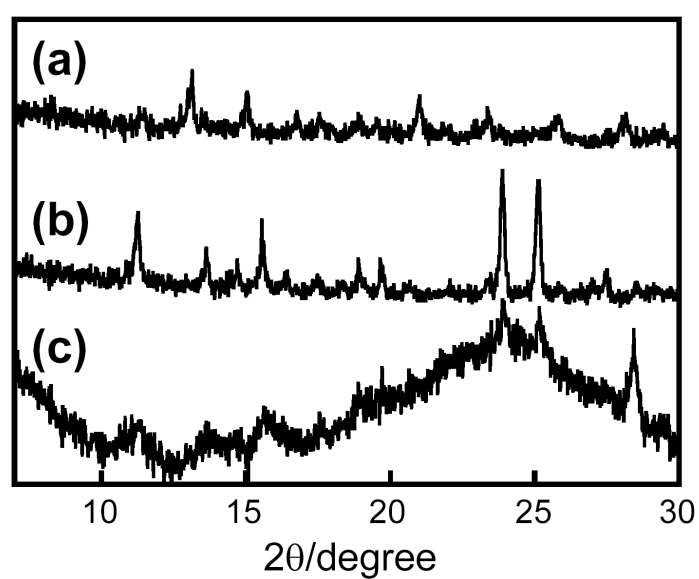

**Fig. S3.** Powder X-ray diffraction patterns. a, Microcrystal **1a- $\alpha$** . b, Microcrystal **1a- $\gamma$** . c, **1a/PMMA** film heated for 2 min at 130 °C.

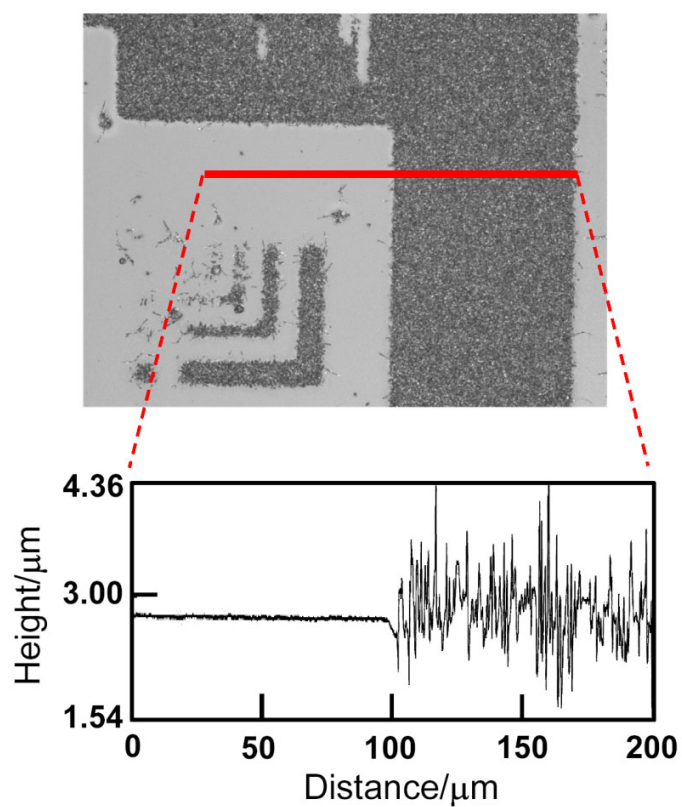

**Fig. S4.** Cross-sectional view of a part on photomicro patterning. The left and right sides in the sectional view are the amorphous and microcrystalline states, respectively.

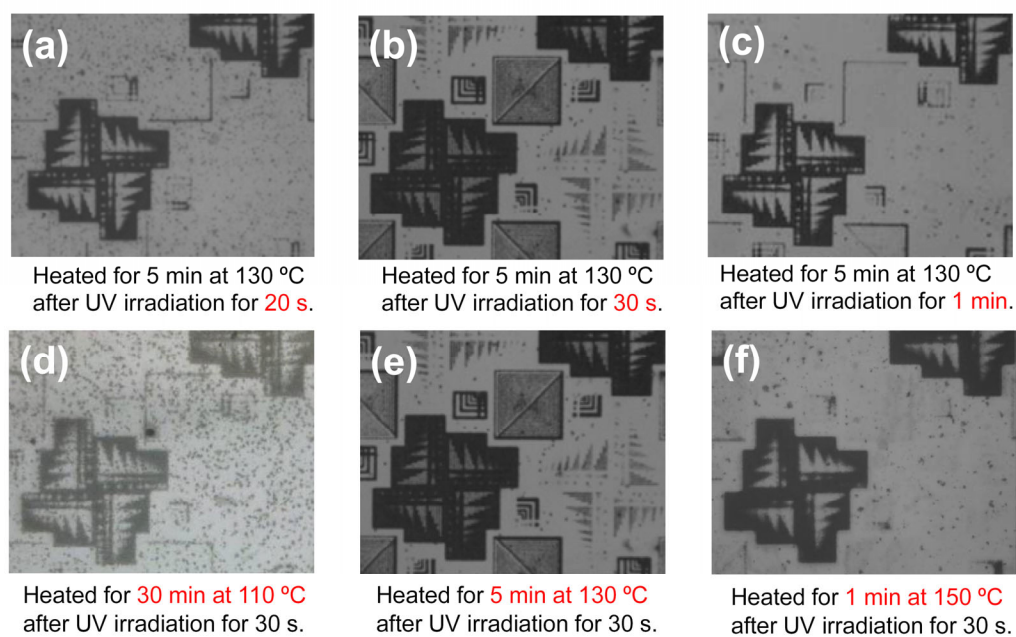

**Fig. S5.** Optical microphotographs of photopatterning prepared under the various conditions. The white and black parts are the amorphous and micro-crystalline states, respectively. b and e are under the same condition.

**Table S1.** X-ray crystallographic data of **1a- $\gamma$** .

|                          | <b>1a-<math>\gamma</math></b>                                                                                                                                       |
|--------------------------|---------------------------------------------------------------------------------------------------------------------------------------------------------------------|
| Formula                  | C <sub>23</sub> H <sub>12</sub> F <sub>6</sub> N <sub>2</sub> O <sub>4</sub> S <sub>2</sub>                                                                         |
| Formula weight           | 558.7                                                                                                                                                               |
| Temperature              | 190.(2) K                                                                                                                                                           |
| Crystal system           | trigonal                                                                                                                                                            |
| Space group              | R3(h)                                                                                                                                                               |
| Unit cell dimensions     | $a = 32.1473(15) \text{ \AA}$<br>$b = 32.1473(15) \text{ \AA}$<br>$c = 11.6175(8) \text{ \AA}$<br>$\alpha = 90^\circ$<br>$\beta = 90^\circ$<br>$\gamma = 120^\circ$ |
| Volume                   | 10397.6(10) $\text{\AA}^3$                                                                                                                                          |
| <i>Z</i>                 | 18                                                                                                                                                                  |
| Density                  | 1.605 g/cm <sup>3</sup>                                                                                                                                             |
| Goodness-of-fit on $F^2$ | 1.104                                                                                                                                                               |
| $R(I > 2\sigma(I))$      | $R1 = 0.0692$                                                                                                                                                       |
| $R(\text{all data})$     | $wR2 = 0.1208$                                                                                                                                                      |
| $\chi$                   | 0.12(7)                                                                                                                                                             |
